# Supplementary material for: Prevalence and associated factors of symptomatic dry eye among undergraduate students in Hawassa University College of Medicine and Health Sciences, Hawassa, Ethiopia
Source: HighWire-hosted journal article supplement (doi:10.1136/bmjophth-2022-001149), 2022-12-01
Supplement: bmjophth-2022-001149supp001_data_supplement.pdf [file bmjophth-2022-001149supp001_data_supplement.pdf]

**Table 1 Characteristics of participants in the study of prevalence and associated factors of symptomatic dry eye among undergraduate students of College of Medicine and Health Science, Hawassa University, Hawassa, Ethiopia (n = 311)**

| <b>Variables</b>                                 | <b>Frequency (n)</b> | <b>Percentage (%)</b> |
|--------------------------------------------------|----------------------|-----------------------|
| <b>Sex</b>                                       |                      |                       |
| Male                                             | 176                  | 56.6                  |
| Female                                           | 135                  | 43.4                  |
| <b>Category</b>                                  |                      |                       |
| Medical                                          | 202                  | 65                    |
| Health Science                                   | 109                  | 35                    |
| <b>Class year</b>                                |                      |                       |
| Second                                           | 108                  | 34.7                  |
| Third                                            | 88                   | 28.3                  |
| Fourth                                           | 59                   | 19                    |
| Fifth                                            | 44                   | 14.1                  |
| Sixth                                            | 12                   | 3.9                   |
| <b>Eye disease in last 1 year</b>                |                      |                       |
| Yes                                              | 65                   | 20.9                  |
| No                                               | 246                  | 79.1                  |
| <b>Wearing eye glass</b>                         |                      |                       |
| Yes                                              | 57                   | 18.3                  |
| No                                               | 254                  | 81.7                  |
| <b>Use of ophthalmic drops</b>                   |                      |                       |
| Yes                                              | 61                   | 19.6                  |
| No                                               | 250                  | 80.4                  |
| <b>CVS awareness</b>                             |                      |                       |
| Yes                                              | 57                   | 18.3                  |
| No                                               | 254                  | 81.7                  |
| <b>Duration of visual display use (VDU) /day</b> |                      |                       |
| Less than 6 hours                                | 141                  | 45.3                  |
| Greater than 6 hours                             | 170                  | 54.7                  |
