# Supplementary material for: Prevalence and associated factors of symptomatic dry eye among undergraduate students in Hawassa University College of Medicine and Health Sciences, Hawassa, Ethiopia
Source: HighWire-hosted journal article supplement (doi:10.1136/bmjophth-2022-001149), 2022-12-01
Supplement: bmjophth-2022-001149supp002_data_supplement.pdf [file bmjophth-2022-001149supp002_data_supplement.pdf]

**Table 2 The prevalence of symptomatic dry eye (SDE) among undergraduate students of College of Medicine and Health Science, Hawassa University, Hawassa, Ethiopia (n = 311)**

| <b>Symptomatic dry eye</b>                   | <b>Frequency (n)</b> | <b>Percentage (%)</b> |
|----------------------------------------------|----------------------|-----------------------|
| <b>Yes (OSDI score <math>\geq</math> 13)</b> | 153                  | 49.2%                 |
| Mild (score 13-22)                           | 66                   | 43.14%                |
| Moderate (score 23-32)                       | 37                   | 24.1%                 |
| Severe (33-100)                              | 50                   | 32.67%                |
| <b>No (OSDI score 0 -12)</b>                 | 158                  | 50.8%                 |
