# Supplementary material for: Prevalence and associated factors of symptomatic dry eye among undergraduate students in Hawassa University College of Medicine and Health Sciences, Hawassa, Ethiopia
Source: HighWire-hosted journal article supplement (doi:10.1136/bmjophth-2022-001149), 2022-12-01
Supplement: bmjophth-2022-001149supp003_data_supplement.pdf [file bmjophth-2022-001149supp003_data_supplement.pdf]

**Table 3** The bi-variable and multivariable logistic regression analysis of prevalence and associated factors of SDE among undergraduate students of College of Health Science, Hawassa University, Hawassa, Ethiopia (n = 311)

| <b>Variables</b>               | <b>COR (95% CI)</b>  | <b>AOR (95% CI)</b>  | <b>p-value</b> |
|--------------------------------|----------------------|----------------------|----------------|
| <b>Sex</b>                     |                      |                      |                |
| Male                           | 1                    | 1                    |                |
| Female                         | 1.329[0.847-2.083]   | 1.337[0.816-2.191]   | 0.250          |
| <b>Class year</b>              |                      |                      |                |
| Second year                    | 5.00 [1.046-23.898]  | 5.999[1.105-32.558]  | 0.038*         |
| Third year                     | 10.172[2.091-49.481] | 11.550[2.120-62.937] | 0.005*         |
| Fourth year                    | 2.973[0.596-14.833]  | 2.901[0.525-16.026]  | 0.222          |
| Fifth year                     | 2.857[0.555-14.696]  | 2.638[0.458-15.187]  | 0.277          |
| Sixth year                     | 1                    | 1                    |                |
| <b>Eye disease history</b>     |                      |                      |                |
| Yes                            | 2.633[1.478-4.692]   | 2.017[0.957-4.252]   | 0.065          |
| No                             | 1                    | 1                    |                |
| <b>Eye glass wearing</b>       |                      |                      |                |
| Yes                            | 2.661[1.445-4.901]   | 2.098[0.952-4.622]   | 0.066          |
| No                             | 1                    | 1                    |                |
| <b>Use of ophthalmic drops</b> |                      |                      |                |
| Yes                            | 2.115[1.185-3.773]   | 2.063[1.073-3.957]   | <b>0.03*</b>   |
| No                             | 1                    | 1                    |                |
| <b>VDU per day</b>             |                      |                      |                |
| Less than 6 hours              | 1                    | 1                    |                |
| Greater than 6 hours           | 0.681[0.435-1.067]   | 0.763[0.465-1.250]   | 0.282          |
